# Supplementary material for: Structure of the first representative of Pfam family PF09410 (DUF2006) reveals a structural signature of the calycin superfamily that suggests a role in lipid metabolism
Source: PubMed Central journal article supplement (PMC2954199; doi:10.1107/s1744309109037749), 2009-12-08
Supplement: f-66-01153-sup1.pdf [file f-66-01153-sup1.pdf]

## Supplementary Material

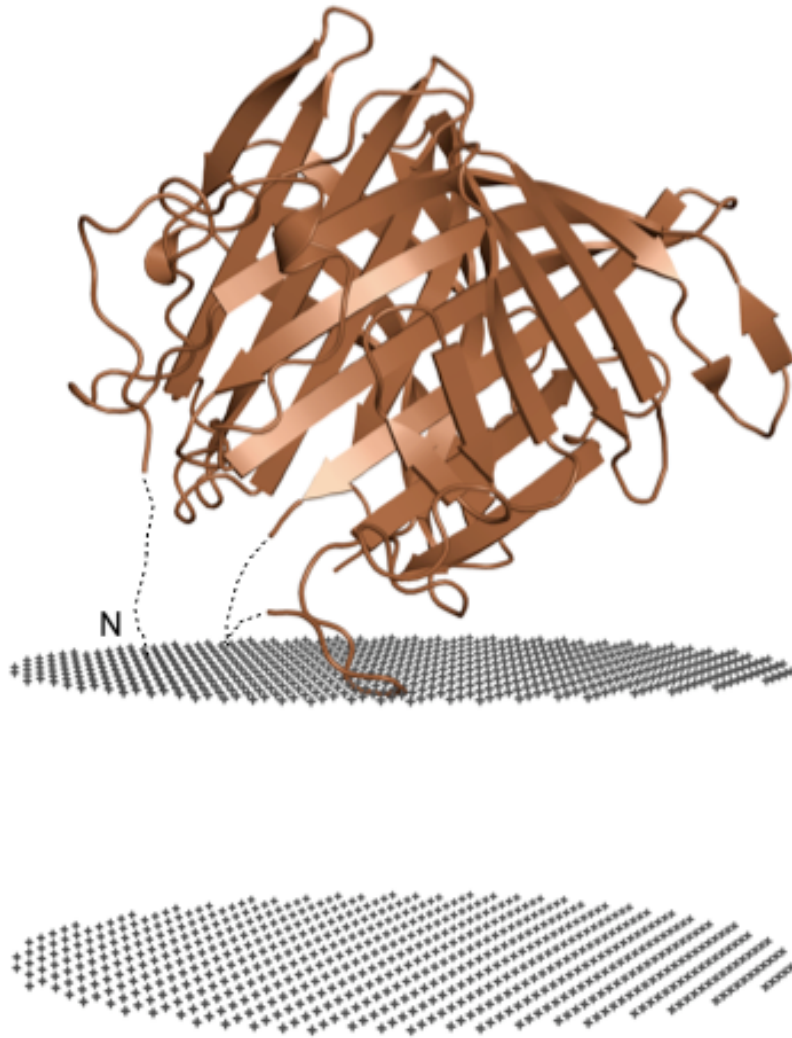

**Figure S1. Model of NE1406 interacting with a membrane.** The hydrocarbon boundary planes of the lipid bilayer (head groups of lipids go  $\sim 10$  Å beyond these boundaries) are depicted as hashed disks. Dashed lines indicate the regions not modeled in the protein structure. The predicted N-terminus is indicated.
